# Supplementary figures and images for: Growth Increase in the Herbaceous Plant Centella asiatica by the Plant Growth-Promoting Rhizobacteria Priestia megaterium HyangYak-01
Source: MDPI journal article supplement (doi:10.3390/plants12132398), 2023-06-21

**A**

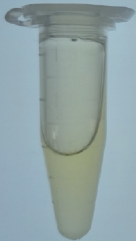

**B**

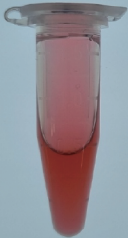

**C**

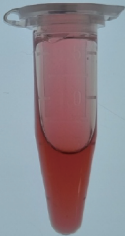

**D**

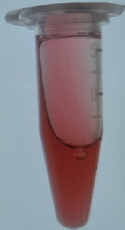

Supplement: s1 [file s1]
